## Review

**FoxP3<sup>+</sup> CD4<sup>+</sup> T cells in systemic autoimmune diseases: the delicate balance between true regulatory T cells and effector Th-17 cells**Wayel H. Abdulahad<sup>1</sup>, Annemieke M. H. Boots<sup>1</sup> and Cees G. M. Kallenberg<sup>1</sup>**Abstract**

Breakdown of tolerance is a hallmark of autoimmune diseases. Over the past 10 years, there has been increased interest in the role of *FoxP3*<sup>+</sup> regulatory T cells (T<sub>Regs</sub>) in maintaining peripheral tolerance. Dysfunction of these cells is considered to play a major role in the development of autoimmune diseases. Besides their suppressive function, a fraction of these cells has the capacity to differentiate into IL-17-producing cells (Th-17), a phenomenon associated with autoimmune inflammation. The revealed plasticity of T<sub>Regs</sub>, therefore, has obvious implications when designing therapeutic strategies for restoring tolerance in autoimmune diseases using T<sub>Regs</sub>. In this review, we discuss development, classification, molecular characterization and mechanisms of suppression by T<sub>Regs</sub>. In addition, we describe recent data on their potential conversion into Th-17 cells in human systemic autoimmune diseases. We also outline a new strategy for T<sub>Reg</sub>-based therapy via isolation, expansion and re-infusion of highly pure *FoxP3*<sup>+</sup> T<sub>Regs</sub> free of contaminating effector T cells.

**Key words:** T cells, Regulatory T cells, T-helper-17 cells, Systemic autoimmune diseases.

**Introduction**

One of the major challenges in immunology is the understanding of cellular and molecular mechanisms involved in the discrimination between pathogens and autoantigens. Thymic clonal deletion and induction of anergy or apoptosis of self-reactive T cells upon exposure to self-antigen have been considered as major mechanisms of maintaining self-tolerance. Nevertheless, autoreactive T cells may escape these mechanisms and can be detected in the peripheral blood of most individuals [1, 2]. Autoimmunity, however, occurs in only 5% of the general population, suggesting the existence of other control mechanisms to prevent autoimmune responses.

T cells suppressing immune responses were first described in the early 1970s by Gershon and Kondo [3, 4]. In the mid-1990s, Sakaguchi *et al.* [5] reintroduced the paradigm of T-cell-mediated self-tolerance by

identifying a subset of peripheral CD4<sup>+</sup> T cells expressing the IL-2 receptor  $\alpha$ -chain (CD25), which were found critical for preventing autoimmunity. They showed that CD4<sup>+</sup> T cells depleted of CD25<sup>+</sup> T cells from normal mice, when transferred into syngeneic athymic nude mice induced the development of multi-organ autoimmune disease in the recipients, whereas disease development was prevented by co-transfer of CD25<sup>+</sup>CD4<sup>+</sup> T cells together with CD25<sup>-</sup> T cells. This observation re-evoked interest in T-suppressor cells, and defined the primary phenotype of these cells. Subsequently, *in vitro* studies showed that human suppressor CD4<sup>+</sup> T cells, also termed regulatory T cells (T<sub>Regs</sub>), constitute only those CD4<sup>+</sup> T cells with the highest level of CD25 expression [6]. A decrease in frequency or impaired function of T<sub>Regs</sub> has been observed in several autoimmune diseases in humans, suggesting a role of these cells in the control of autoimmunity [7]. Modulation of T<sub>Reg</sub> function and number may thus present an option for immunotherapy of autoimmune diseases.

**Development and classification of T<sub>Regs</sub>**

Several lines of evidence, based on studies in experimental animals, support the hypothesis that T<sub>Regs</sub> originate in the thymus. It has been observed that 5% of

<sup>1</sup>Department of Rheumatology and Clinical Immunology, University Medical Center Groningen, University of Groningen, Groningen, The Netherlands.

Submitted 3 June 2010; revised version accepted 31 August 2010.

Correspondence to: Wayel H. Abdulahad, Department of Rheumatology and Clinical Immunology, University Medical Center Groningen, Hanzeplein 1, 9713 GZ, Groningen, The Netherlands. E-mail: w.abdulahad@int.umcg.nl

CD4<sup>+</sup>CD8<sup>-</sup> thymocytes express CD25. The frequency and functional characteristics of these CD25<sup>+</sup>CD4<sup>+</sup>CD8<sup>-</sup> thymocytes are similar to cells with the same phenotype found in the peripheral blood [8]. As CD4<sup>+</sup>CD8<sup>-</sup> thymocytes depleted of CD25<sup>+</sup> cells from mature mice produce a spectrum of autoimmune pathology when transferred into syngeneic athymic nude recipient mice, one might conclude that the normal thymus produces functionally mature CD25<sup>+</sup>CD4<sup>+</sup> T cells capable of controlling autoimmune pathogenic T cells [8]. Mice deficient for MHC Class II on cortical thymic epithelial cells fail to develop CD4<sup>+</sup>CD25<sup>+</sup>T<sub>Reg</sub> cells, suggesting that generation of T<sub>Regs</sub> is an early (cortical) event during thymocyte development [9]. In contrast, a recent study by Aschenbrenner *et al.* [10] provides unambiguous evidence that generation of T<sub>Regs</sub> in the thymus is a late (medulla) event, which is mediated by medullary thymic epithelial cells.

Once generated, thymic T<sub>Regs</sub> are released into the circulation to control auto-reactive responses. These T<sub>Regs</sub> are referred to as naturally occurring regulatory T cells (nT<sub>Regs</sub>).

In addition to nT<sub>Regs</sub>, accumulating evidence suggests that another type of T<sub>Reg</sub> arises from conventional naïve CD4<sup>+</sup> T cells upon encountering extrathymic antigens (Fig. 1). These T<sub>Regs</sub> that develop extrathymically are termed adaptive/induced T<sub>Regs</sub> (iT<sub>Regs</sub>).

iT<sub>Regs</sub> were originally identified in studies on mechanisms associated with oral tolerance. Weiner and colleagues [11] were the first to discover a population of antigen-reactive TGF-β-secreting CD4<sup>+</sup> T cells with regulatory function in mice that were orally tolerized to myelin basic protein (MBP). This distinct lineage of T cells was termed regulatory Th3 cells [11]. Interestingly, Sundstedt *et al.* [12] have shown that intranasal administration of MBP induces the appearance of IL-10-secreting CD4<sup>+</sup> T cells with suppressor capacity. This subset of regulatory T cells was described earlier by Groux *et al.* [13] and termed regulatory type-1 cells (Tr1). Both Th3 and Tr1 cells lack the transcription factor FoxP3, which was originally thought to be uniquely expressed by nT<sub>Regs</sub> (see below); however, their suppressive properties resemble those of FoxP3<sup>+</sup> T<sub>Regs</sub>. In addition to FoxP3<sup>-</sup> iT<sub>Regs</sub>, there also appears to be a population

**Fig. 1** Overview of T<sub>Reg</sub>-cell subsets and their proposed mechanisms of suppression. nT<sub>Regs</sub> and conventional naïve CD4<sup>+</sup>CD25<sup>-</sup> T cells are generated from the thymus. nT<sub>Regs</sub> arise following intrathymic antigen encounter, can suppress effector cells by either reducing the antigen-presenting capacity of APC or by triggering IDO activity in APC, resulting in the generation of suppressive metabolites. In addition, nT<sub>Reg</sub> cells can interact directly with effector cells to inhibit their activation or induce death of effector cells by release of cytotoxic factors. On the other hand, iT<sub>Regs</sub> arise from naïve T cells, upon encounter with extrathymic antigens, and include FoxP3<sup>-</sup> iT<sub>Reg</sub> (T-regulatory-1/T-helper-3) and FoxP3<sup>+</sup> iT<sub>Reg</sub> cells. The suppressor effect induced by iT<sub>Reg</sub> cells is mainly mediated by cytokine expression.

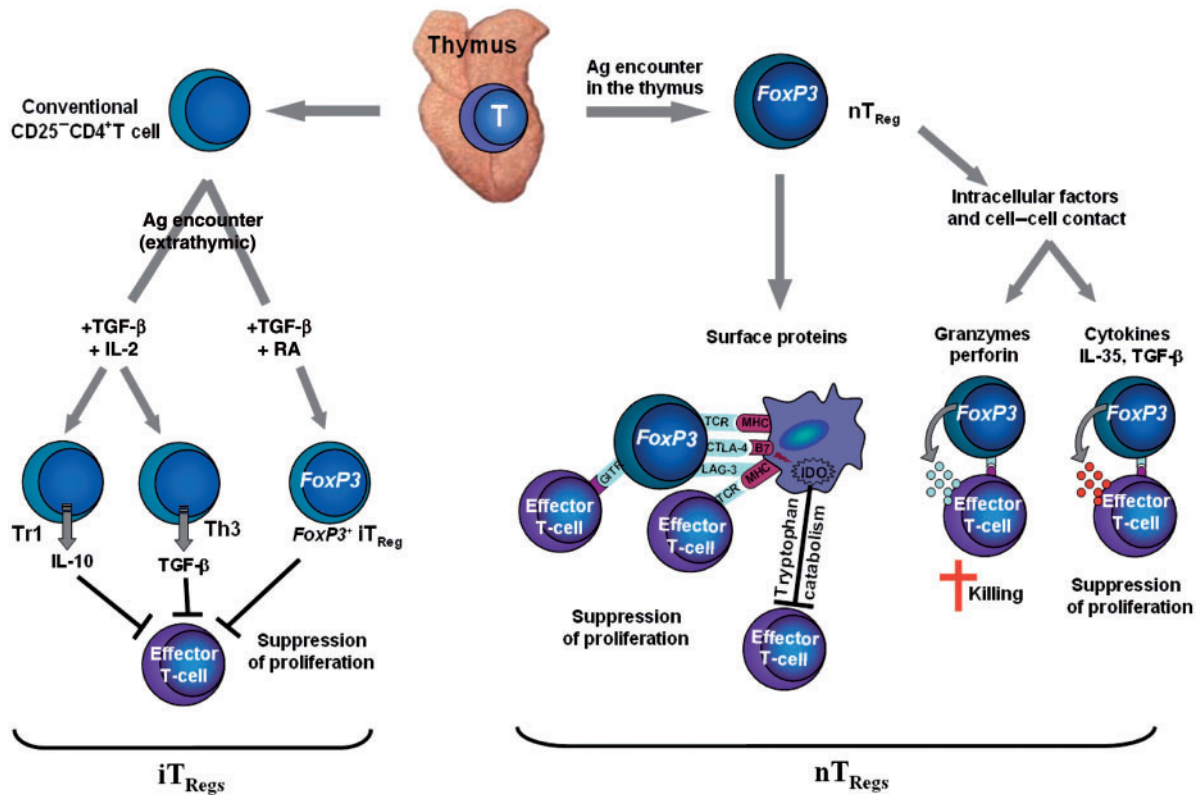

of *FoxP3*<sup>+</sup> *iT*<sub>Regs</sub>. Recent studies demonstrate that a population of gut dendritic cells (DCs), particularly lamina propria CD103<sup>+</sup> DCs, can promote the conversion of naïve CD4<sup>+</sup> T cells into *FoxP3*<sup>+</sup> *iT*<sub>Regs</sub> through the secretion of retinoic acid (RA) in conjunction with TGF-β [14, 15]. Human *FoxP3*<sup>+</sup> *T*<sub>Regs</sub> can also be classified into resting and activated *T*<sub>Regs</sub> according to a recent report by Miyara *et al.* (see below) [16].

Collectively, there are at least two distinct types of *T*<sub>Reg</sub>: the *nT*<sub>Regs</sub>, which are generated in the thymus upon intrathymic antigen encounter; and the *iT*<sub>Regs</sub>, which are generated in the periphery upon extrathymic antigen encounter. Whereas the role of *iT*<sub>Regs</sub> in controlling pathological immune responses has been described in mouse models, data relating to their role in human systemic autoimmune diseases are currently lacking. Therefore, we will focus on *nT*<sub>Regs</sub> in this review.

### Molecular characterization of *T*<sub>Regs</sub>

A major advance in the understanding of *nT*<sub>Reg</sub> function was the discovery of the uniquely expressed transcription factor *FoxP3*, which controls the development and function of *T*<sub>Regs</sub> [17, 18]. The gene *FoxP3*, encoding the so-called scurfin protein, was first identified as a mutated gene in the scurfy mouse strain, which is an X-linked recessive mouse mutant. This mutation leads to lethality of hemizygous males 16–25 days after birth in association with lymphoproliferation and multi-organ infiltration of CD4<sup>+</sup> T cells with overproduction of cytokines by these cells [19]. Similarly, the mutated *FoxP3* gene was identified in humans as a causative gene for the X-linked syndrome IPEX (immunodysregulation, polyendocrinopathy, enteropathy, X-linked syndrome) [20–22]. Further analysis revealed that both in scurfy mice and IPEX patients, *T*<sub>Regs</sub> expressing CD4 and CD25 are lacking. Furthermore, retroviral transduction of naïve CD25<sup>−</sup>CD4<sup>+</sup> T cells with *FoxP3* can convert them into *T*<sub>Regs</sub>, both phenotypically and functionally [18]. These findings demonstrate the importance of *FoxP3* as a master regulator of *nT*<sub>Reg</sub> development and function. However, *FoxP3* expression in human T cells was not directly correlated with their suppressive capabilities, and *FoxP3* was also shown to be expressed in activated non-*T*<sub>Regs</sub>, indicating that *FoxP3* is not a unique marker to identify human *T*<sub>Regs</sub> [23, 24]. In accordance, Miyara *et al.* [16] have shown recently that human *FoxP3*<sup>+</sup> T cells are functionally heterogeneous, and can be classified into three phenotypically distinct subpopulations based on the expression level of *FoxP3* and the naïve T-cell marker (CD45RA). These three subpopulations can be defined as: activated suppressor *T*<sub>Regs</sub> (*FoxP3*<sup>High</sup>CD45RA<sup>−</sup>), resting suppressor *T*<sub>Regs</sub> (*FoxP3*<sup>Low</sup>CD45RA<sup>+</sup>) and non-suppressor *T*<sub>Regs</sub> (*FoxP3*<sup>Low</sup>CD45RA<sup>−</sup>).

Concerning the surface characteristics of *T*<sub>Regs</sub>, a number of molecules have been reported to be constitutively expressed on *T*<sub>Regs</sub>, which include, in addition to CD25 and CD45RA, the cytotoxic T-lymphocyte-associated antigen-4 (CTLA-4) [25], lymphocyte activation gene-3 (LAG-3) [26], glucocorticoid-induced TNF receptor

(GITR) [27], L-selectin (CD62L) [28], integrin  $\alpha_E\beta_7$  (CD103) [29], C-C chemokine receptor 7 (CCR7) [28], CCR4 [30], CCR8 [30] and neuropilin-1 [31]. No surface marker was found to definitively distinguish *T*<sub>Regs</sub> from conventional, activated CD4<sup>+</sup> T cells since the majority of the aforementioned surface markers are also expressed on activated T cells. Finally, IL-7R (CD127) has been identified as a new biomarker to distinguish regulatory from activated effector T cells [32, 33]. *T*<sub>Regs</sub> down-regulate the expression of CD127 and its expression is inversely correlated with *FoxP3* expression and suppressive function. Thus, this marker may be used to isolate a highly purified population of *T*<sub>Regs</sub> via cell sorting. In addition, recent reports have identified folate receptor-4 (FR4) [34] and ectonucleotidase CD39 [35] as unique cell-surface markers that distinguish *nT*<sub>Regs</sub> from effector T cells. Moreover, a recent publication has claimed that latency-associated peptide (LAP) and IL-1 receptor Type I (CD121a) and Type II (CD121b) are selectively expressed on activated *FoxP3*<sup>+</sup> *T*<sub>Regs</sub> but not on activated *FoxP3*<sup>+</sup> non-*T*<sub>Regs</sub> [36]. These studies may add to the design of strategies for sorting of functionally active *nT*<sub>Regs</sub>.

Taken together, despite increasing interest in defining the phenotype of *nT*<sub>Regs</sub>, the subset-specific surface marker(s) that are instrumental in the contact-dependent suppressive mechanisms of *nT*<sub>Regs</sub> have as yet not firmly been established and await further studies (Table 1).

### Mechanisms of suppression by *T*<sub>Regs</sub>

Numerous *in vitro* studies have shown that *T*<sub>Regs</sub> control the expansion of naïve T cells, suppress the activation and cytokine production of effector T cells [25, 37], and inhibit B-cell proliferation, immunoglobulin production and class switch [38, 39]. Multiple modes of action have been proposed for the suppressive function of *T*<sub>Regs</sub> (Fig. 1).

Soluble factors such as IL-10 and TGF-β were found to play a key role in the suppression mediated by *iT*<sub>Regs</sub>. *In vitro* findings strongly suggest a role for these cytokines in preventing autoimmune reactions. It has been observed

**TABLE 1** Characteristics of natural and induced human *T*<sub>Reg</sub> cells

| Phenotype/feature                | <i>nT</i> <sub>Reg</sub> | Tr1       | Th3       |
|----------------------------------|--------------------------|-----------|-----------|
| IL-2R $\alpha$ (CD25)            | ++                       | +/-       | +         |
| <i>FoxP3</i> (activated/resting) | +High/+Low               | −         | −         |
| CD45RA (activated/resting)       | −/+                      | ?         | ?         |
| LAG-3                            | +                        | ?         | ?         |
| GITR                             | +                        | −         | ?         |
| CTLA-4                           | +                        | +         | +         |
| IL-10                            | −                        | ++        | +/-       |
| TGF-β                            | +/-                      | +/-       | ++        |
| FR4                              | ++                       | ?         | ?         |
| CD39                             | +                        | ?         | ?         |
| LAP                              | +                        | ?         | ?         |
| IL-1R I/II                       | +                        | ?         | ?         |
| Place of origin                  | Thymus                   | Periphery | Periphery |

?: not known yet.

that T<sub>Regs</sub> isolated from IL-10 knockout mice lack the intrinsic capacity to protect immunodeficient mice from colitis [40–42]. In addition, treatment with anti-IL-10 receptor antibodies accelerated graft rejection [43]. Similarly, TGF-β-deficient mice manifest a spontaneous autoimmune syndrome, while neutralizing antibodies to TGF-β abrogate T<sub>Reg</sub>-mediated suppression of IBD [44–46]. In addition to its effects in a soluble form, TGF-β is also operative as a surface-bound protein on nT<sub>Regs</sub>. It has been shown that surface-bound TGF-β on nT<sub>Regs</sub> induces suppression through TGF-β-R on autoaggressive cells [39]. In agreement, blockade of cell-surface TGF-β disrupts the suppressive function of nT<sub>Regs</sub> [39]. In addition to TGF-β, recent data show that suppression by nT<sub>Regs</sub> is potentiated by soluble IL-35 and IL-10 [47–49]. Thus, the production of soluble factors appears to be crucial for both iT<sub>Reg</sub><sup>-</sup> and nT<sub>Reg</sub>-mediated suppression.

Another model of T<sub>Reg</sub>-mediated suppression suggests a cytotoxic mechanism by which T<sub>Regs</sub> induce death of effector T cells (T<sub>eff</sub>) via release of granzymes in a perforin- and Fas-independent way [50, 51]. Accordingly, T<sub>Regs</sub> from granzyme-B-deficient mice showed a reduced capacity to suppress T<sub>eff</sub> proliferation. Otherwise, activated T<sub>Regs</sub> were recently reported to suppress B-cell proliferation *in vitro* by inducing apoptosis of these cells via a granzyme-B-mediated cytotoxic mechanism in a perforin-dependent way [52]. This suggests involvement of granzyme-B in a cell contact-dependent kill mechanism.

In addition to the aforementioned mechanisms, *in vivo* and *in vitro* studies have demonstrated that nT<sub>Regs</sub> can suppress the immune response by modulating the function of antigen-presenting cells (APCs). This is mediated via interaction between CTLA-4 or LAG3 (also called CD223) on nT<sub>Regs</sub> and CD80/CD86 or MHC Class II molecules on APCs, respectively. Ligation of CD80/CD86 on APC by CTLA-4 on T<sub>Regs</sub> triggers the induction of the enzyme indoleamine 2,3-dioxygenase (IDO) in APCs, which converts tryptophan into pro-apoptotic metabolites that suppress effector T cells [53]. On the other hand, engagement of MHC Class II molecules on APCs by LAG3 on T<sub>Regs</sub> suppresses APC maturation and reduces their ability to activate T cells [26, 54]. Moreover, T<sub>Regs</sub> can mediate suppression via a metabolic disruption through CD39 and CD73. These two ectoenzymes hydrolyse ATP or ADP to extracellular adenosine monophosphate, which inhibits effector T-cell functions through activating the adenosine A2A receptor [55–57].

In summary, many data have been collected on the suppressive mechanisms involved in the function of T<sub>Regs</sub>, but the precise mechanism of action of immune suppression requires further studies.

### Human T<sub>Regs</sub> are not terminally differentiated but may convert to Th-17 cells

Besides the key role of T<sub>Regs</sub> in the prevention of autoimmune diseases, a recent breakthrough has revealed

that IL-17-secreting cells (Th-17) are the main pathogenic effector subset involved in the induction of inflammation and autoimmunity [58, 59]. During the past 2 years, multiple reports indicate a link between T<sub>Regs</sub> and Th17 cells. It has been demonstrated that, *in vitro* and *in vivo*, activation of T cells in the presence of TGF-β results in the generation of FoxP3<sup>+</sup> T<sub>Regs</sub>; however, the combination of IL-6 and TGF-β promotes the generation of Th17 cells, suggesting that both T-cell subsets may differentiate from the same precursor T cell [60]. Indeed, a reciprocal relationship between T<sub>Regs</sub> and Th-17 cells has been shown recently at a molecular level [61]. It was found that full-length Foxp3 directly binds the Th-17-specific transcription factor RORγt and inhibits the expression of genes that define Th-17 cells [61]. Collectively, these findings suggest that the balance of TGF-β and IL-6 might determine the differentiation of T<sub>Reg</sub>/Th-17 cells through antagonistic competition of FoxP3 and RORγt, and may underlie the propensity of T<sub>Regs</sub> to convert to Th-17 cells in the context of pro-inflammatory stimuli. This phenomenon has only recently been recognized in man [62–64]. It has been shown that a subset of circulating human FoxP3<sup>+</sup>CD4<sup>+</sup> T cells can express the Th-17 lineage-specific transcription factor RORγt and has the capacity to produce IL-17 upon activation [62–65]. Importantly, the production of IL-17 by this T<sub>Reg</sub> subset was associated with concomitant loss of its suppressive function. However, others have demonstrated that IL-17-secreting FoxP3<sup>+</sup> T<sub>Regs</sub> still maintain their suppressive function [64, 65]. Although FoxP3 is critical for the suppressive function, IL-17 has been implicated in mediating inflammation and autoimmune diseases. Thus, production of IL-17 by a subset of FoxP3<sup>+</sup> T<sub>Regs</sub> could place this subset within the category of effector T cells instead of regulatory cells.

The functional duality of this T-cell lineage appears to be generated in the periphery, as the human thymus does not contain IL-17-producing FoxP3<sup>+</sup>CD4<sup>+</sup> T cells [63]. The latter cells may originate from circulating FoxP3<sup>+</sup> iT<sub>Regs</sub> or circulating FoxP3<sup>+</sup> nT<sub>Regs</sub> or from FoxP3<sup>+</sup> iT<sub>Regs</sub>.

The conversion of human FoxP3<sup>+</sup> T<sub>Regs</sub> into IL-17-producing cells can be enhanced in the context of an inflammatory cytokine milieu. Recent reports have shown that IL-1β alone or in combination with IL-23 or IL-6 induces this conversion [62, 65, 66]. Also other cytokines such as IL-2, IL-21 and IL-6 may act cooperatively to induce FoxP3<sup>+</sup> T<sub>Reg</sub> differentiation into IL-17-producing cells [64]. Of note, IL-1β is critically involved in switching of FoxP3<sup>+</sup> T<sub>Regs</sub> towards IL-17-producing cells and IL-1 receptor (IL-1R) counteracts this process, suggesting that IL-1R expression is involved [62]. Currently, Lee *et al.* [67] have further substantiated this notion and shown that the effect of IL-1β on promoting IL-17 production was dynamically regulated via IL-1R type I, a receptor that was found to be up-regulated on activated CD4<sup>+</sup> T-cells upon IL-15 treatment. It is also notable that monocytes differentiated with IL-15 produce inflammatory mediators that may influence the T<sub>Reg</sub>/Th-17 axis [68]. It seems that IL-15 acts as an important factor in the



generation of IL-17-producing T cells [69]. As such, the role of IL-15 in the  $T_{\text{Reg}}/\text{Th-17}$  balance in autoimmunity awaits to be assessed.

Based on the aforementioned *in vitro* data and the reciprocal relationship of  $T_{\text{Reg}}/\text{Th-17}$  cells, it can be hypothesized that reduced numbers of  $\text{FoxP3}^+$   $T_{\text{Regs}}$  in patients with inflammatory autoimmune diseases may occur due to enhanced conversion of these cells into IL-17-secreting cells in the context of an inflammatory milieu (Fig. 2).

## Do $T_{\text{Regs}}$ convert to pathogenic Th-17 cells in human systemic autoimmune diseases?

Alteration in cell number or function of  $T_{\text{Regs}}$  is associated with several autoimmune diseases [7]. Studies on peripheral tolerance in systemic autoimmune diseases have focused predominantly on abnormalities in  $\text{FoxP3}^+$   $T_{\text{Reg}}$  frequency or function, but did not accurately address the stability of  $\text{FoxP3}$  expression in  $T_{\text{Regs}}$  or the co-expression of other lineage transcription factors such as  $\text{ROR}\gamma\text{t}$  and the possible differentiation into IL-17-producing cells. Evidence for enhanced Th-17 responses in systemic autoimmune disease, however, is available and appears to support the hypothesis of conversion of  $T_{\text{Regs}}$  into pathogenic cells. Here, we summarize data concerning the involvement of  $\text{FoxP3}^+$   $T_{\text{Regs}}$  as well as Th-17 cells in several human systemic

**Fig. 2** Conversion of  $\text{CD4}^+$  T cells into IL-17-producing cells (Th-17). Priming of naive T cells ( $\text{CD4}^+\text{CD25}^-$ ) and  $\text{FoxP3}^+$   $T_{\text{Reg}}$  cells by antigen (Ag) presented on DCs, in the context of inflammatory cytokines, can convert them into pro-inflammatory IL-17-producing cells (Th-17) that may contribute to disease progression.

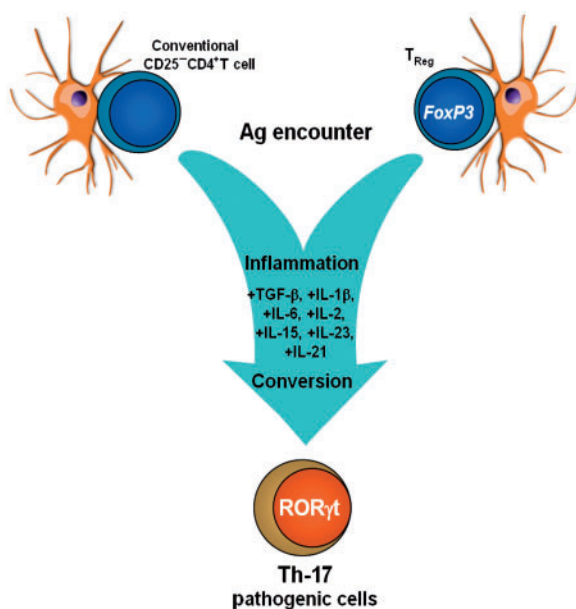

autoimmune diseases and discuss the inflammatory condition that may induce skewing of  $\text{FoxP3}^+$   $T_{\text{Regs}}$  towards IL-17-producing cells.

## SLE

Although the aetiology of SLE is unknown, recent data suggest a role for  $T_{\text{Regs}}$  in disease pathogenesis. Studies in lupus mice models have demonstrated that depletion of  $\text{CD25}^+\text{CD4}^+$  T cells induces an increase in anti-dsDNA antibodies and accelerates the development of GN [70, 71]. In line with this observation, Lee *et al.* [72] reported an inverse relationship between the percentage of circulating  $\text{CD4}^+\text{CD25}^+$  T cells and serum levels of anti-dsDNA antibodies in paediatric patients with SLE. Other studies evaluating levels of circulating  $\text{CD4}^+\text{CD25}^{\text{High}}$  T cells in SLE patients are consistent in their results demonstrating a decrease in absolute numbers as well as in the proportion of  $\text{CD4}^+\text{CD25}^{\text{High}}$  T cells in active SLE patients as compared with healthy controls [73–75]. Analysis of  $\text{FoxP3}$  expression reveals decreased frequencies of  $\text{CD4}^+\text{CD25}^{\text{High}}\text{FoxP3}^+$  T cells and increased frequencies of  $\text{CD4}^+\text{CD25}^{\text{Low}}\text{FoxP3}^+$  and  $\text{CD4}^+\text{CD25}^{\text{Low}}\text{FoxP3}^+$  T cells in active SLE patients in comparison with the control group [76–78]. Consistent with these findings,  $\text{CD4}^+\text{CD25}^{\text{High}}$  T cells from patients with active SLE have diminished suppressive activity *in vitro* [79, 80]. Importantly, the suppressive activity of  $\text{CD4}^+\text{CD25}^{\text{High}}$  T cells from active SLE patients could be restored after *in vitro* activation with anti-CD3 in the presence of IL-2 [80]. This suggests that *in vivo* (in the diseased situation) other factors may be involved in altering numbers and function of  $T_{\text{Regs}}$ . As mentioned, pro-inflammatory cytokines, such as IL-1 $\beta$ , IL-23 and possibly IL-15, may mediate the gradual conversion of  $\text{FoxP3}^+$   $T_{\text{Regs}}$  gradually into IL-17-producing cells. Indeed, increased levels of serum IL-23, IL-15 and IL-17 were also observed in SLE patients reflecting an enhanced Th-17 response [81–85]. Furthermore, increased frequency of circulating Th-17 cells in correlation with disease activity was recently demonstrated in SLE patients [86]. In view of these findings, we propose that, due to increased levels of inflammatory cytokines,  $T_{\text{Regs}}$  are converted into effector Th-17 cells that may contribute to flares of disease activity in SLE patients. Further investigations directed at the plasticity of  $T_{\text{Regs}}$  in SLE patients are warranted.

## RA

$T_{\text{Regs}}$  in patients with RA appear to be present in normal numbers and to exhibit all of the features of  $T_{\text{Regs}}$ , not only in phenotype but also in their suppression of T-cell proliferation *in vitro* [87, 88]. However, circulating  $T_{\text{Regs}}$  isolated from patients with active RA are unable to suppress the release of pro-inflammatory cytokines by activated T cells and monocytes [88].  $T_{\text{Regs}}$  from RA patients were shown to receive increased co-stimulatory signals from activated monocytes, leading to a decrease in their suppressive capacity [89]. It has recently been demonstrated that monocytes can induce a gradual conversion of  $T_{\text{Regs}}$

into Th-17 cells, which may underlie the dysfunction of T<sub>Regs</sub> *in vivo* [62]. Interestingly, elevated levels of IL-15, produced by monocytes and DCs in response to inflammatory stimuli, were found in serum and SF of RA patients [90–92]. Also, increased numbers of Th-17 cells were observed in the peripheral blood and the SF of RA patients [93, 94]. Moreover, IL-15 was found to trigger IL-17 production in T cells from human RA peripheral blood or synovial mononuclear cells [92]. It is tempting to speculate that IL-15 contributes to a milieu favouring the differentiation of FoxP3<sup>+</sup> T<sub>Regs</sub> into IL-17-producing cells. These data strengthen the hypothesis that FoxP3<sup>+</sup> T<sub>Regs</sub> in RA patients display an effector differentiation programme that result in pathogenic IL-17-producing cells. It should be appreciated, however, that IL-17-producing FoxP3<sup>+</sup> T<sub>Regs</sub> in RA patients await to be identified.

### WG

WG is a systemic vasculitis associated with ANCA mainly directed against proteinase 3. This disorder is characterized by granulomatous inflammation, particularly of the airways and pauci-immune vasculitis and GN [95, 96]. Several lines of evidence suggest involvement of T cells in this disease [97–99]. In a recent study [100], we analysed the distribution and function of circulating T<sub>Regs</sub> in WG. We found that FoxP3<sup>+</sup> T<sub>Regs</sub> were significantly increased in WG patients as compared with healthy controls. However, we observed a defective suppressor function of T<sub>Regs</sub> in this group of patients [100]. It is possible that T<sub>Regs</sub> from WG patients convert into IL-17-secreting cells in the context of an inflammatory cytokine milieu. A recent study has reported increased levels of serum IL-23 and IL-17 in WG patients [101]. In addition, expression of IL-15 has been demonstrated in areas with granuloma formation of WG patients, which may contribute to a shift of FoxP3<sup>+</sup> T<sub>Regs</sub> into IL-17-producing cells [102]. More importantly, we demonstrated an increase in the percentage of Th-17 cells in WG patients as compared with healthy controls [103]. These data favour the conversion of T<sub>Regs</sub> towards IL-17-producing T cells in WG patients. Therefore, FoxP3<sup>+</sup>CD4<sup>+</sup> T cells in WG patients are possibly effector cells rather than T<sub>Regs</sub>. This may also explain the inconsistency between increased levels of FoxP3<sup>+</sup> T<sub>Regs</sub> in WG patients, on the one hand, and a defective suppressor function of these cells, on the other. Future studies in WG patients should analyse the expression of IL-17 and ROR $\gamma$ t in FoxP3<sup>+</sup> T cells.

### SS

SS is an autoimmune exocrinopathy, characterized by chronic inflammation and destruction of the lacrimal and salivary glands resulting in dryness of the eyes (KCS) and mouth (xerostomia) [104]. Similar to other autoimmune diseases, impairment in number or function of T<sub>Regs</sub> could be involved in the development and perpetuation of SS. However, studies on T<sub>Regs</sub> in SS patients have yielded controversial results. Gottenberg *et al.* [105] reported that SS patients have increased CD4<sup>+</sup>CD25<sup>+</sup>High

T cells in the peripheral blood, and that these cells exert normal suppressive activity. Contrary to this study, other studies have reported decreased proportions of CD4<sup>+</sup>CD25<sup>+</sup>High T cells in the peripheral blood and also in the salivary glands of SS patients [106, 107]. Recently, Christodoulou *et al.* [108] studied FoxP3<sup>+</sup> T<sub>Regs</sub> in the peripheral blood and in minor salivary glands of SS patients. Levels of FoxP3<sup>+</sup> T<sub>Regs</sub> in the peripheral blood of SS patients were comparable with those in healthy controls, but correlated negatively with the frequency of FoxP3<sup>+</sup> T<sub>Regs</sub> in the salivary gland lesions. Importantly, numbers of infiltrating FoxP3<sup>+</sup> T cells in these lesions were positively correlated with the focus scores in the salivary gland biopsy, which suggests an association of infiltrated T<sub>Regs</sub> with the grade of severity of the autoimmune lesion in SS patients [108]. Moreover, increase in IL-15 expression was observed in biopsies from SS patients with ectopic germinal centre formation [109]. Furthermore, infiltrating CD4<sup>+</sup> T cells in the salivary glands of SS patients predominantly expressed IL-17 [110, 111]. In addition, expression levels of IL-17 in the salivary glands progressively increased with higher levels of focus scores [112], as did numbers of FoxP3<sup>+</sup> T<sub>Reg</sub> cells [108]. These data suggest that the inflammatory cytokine milieu within the lesions promotes the conversion of infiltrated FoxP3<sup>+</sup> T<sub>Regs</sub> into IL-17-producing cells that may underlie the development of lymphocyte infiltrates in SS.

### Strategy for expansion and isolation of highly pure FoxP3<sup>+</sup> T<sub>Regs</sub> to be used in cellular therapy

T<sub>Regs</sub> have been suggested to be important for intervention as an alternative to conventional therapy in human autoimmune diseases. In view of the recent findings discussed above, transfer of T<sub>Regs</sub> may be less beneficial or even harmful in established inflammatory conditions, since a fraction of FoxP3<sup>+</sup> T<sub>Regs</sub> may differentiate into Th-17 cells with pathogenic potential. Therefore, depletion of IL-17-producing T<sub>Regs</sub> from the real T<sub>Regs</sub> is proposed. Recently, Kleinewietfeld *et al.* [113] introduced a new approach to isolate a highly purified population of FoxP3<sup>+</sup> T<sub>Regs</sub> free of contaminating effector T cells by depleting cells double positive for CD49d and CD127 from the CD4<sup>+</sup> T-cell population. Thus, isolation of CD49d<sup>-</sup>CD127<sup>-</sup> T<sub>Regs</sub> by a negative selection procedure provides access to a highly pure population of FoxP3<sup>+</sup> T<sub>Regs</sub> that have not been tagged by an antibody, which is expected to be more suited for clinical applications. Indeed, Kleinewietfeld *et al.* [113] have determined the efficacy of CD49d<sup>-</sup>CD127<sup>-</sup> T<sub>Regs</sub> in an acute graft-vs-host disease (GVHD) mouse model. They induced an acute aggressive form of GVHD in mice by transfer of CD25-depleted human peripheral blood mononuclear cells (PBMCs) into Rag2<sup>-/-</sup> $\gamma$ c<sup>-/-</sup> mice. They found that addition of CD49d<sup>-</sup>CD127<sup>-</sup> T<sub>Reg</sub> cells completely prevented GVHD. Taken together, CD49d<sup>-</sup>CD127<sup>-</sup> T<sub>Regs</sub> seem to be potent suppressor cells capable of controlling pro-inflammatory immune responses *in vivo*.

Similar to the aforementioned approach, we propose a two-step, new strategy for adoptive  $T_{Reg}$ -based forms of therapy (Fig. 3). In this two-step approach, we first seek to expand the number of T cells (and thus also the  $nT_{Regs}$ ), and secondly to isolate pure  $T_{Regs}$  via negative selection. To this end, peripheral blood mononuclear cells are isolated from a patient, and stimulated polyclonally with anti-CD3 and anti-CD28 monoclonal antibodies for 7 days in the presence of IL-1 $\beta$ , IL-2, IL-6, IL-15 and IL-23. In this culture condition, numbers of  $T_{Regs}$  will increase, and a fraction of  $FoxP3^+$  T cells will differentiate towards IL-17-producing cells. The fraction of  $FoxP3^+$   $T_{Reg}$  cells that does not produce IL-17 (or does not convert into Th-17 cells) is characterized by lack of surface expression of CD49d and CD127 [113]. The latter fraction of  $T_{Regs}$  can be isolated negatively by two steps using immunomagnetic beads technique (Fig. 3). Here,  $CD8^+$  T cells,  $\gamma/\delta$  T cells, B cells, NK cells, DCs, monocytes, granulocytes and erythroid cells, will be removed by immunomagnetic separation using cell-specific mAbs coupled with magnetic beads. Next, the negatively isolated  $CD4^+$  T cells will be labelled with magnetic beads-conjugated anti-CD49d and CD127 and

anti-CD127, to remove the  $CD49d^+CD127^+$  cells, and the fraction of pure  $FoxP3^+$   $T_{Regs}$  (double negative for CD49d and CD127) will be collected, and finally re-injected into the patients in order to restore the  $T_{Reg}/T$ -effector balance in autoimmune diseases.

It was previously shown that epigenetic modification underlies the phenomenon of  $T_{Reg}$  plasticity [62]. Thus, it is feasible that concomitant treatment with histone deacetylase inhibitors may help stabilize the  $T_{Reg}$  phenotype and may thus add to the success of cellular  $T_{Reg}$  therapy. Clearly, further clinical studies aimed at optimizing this approach for treating human systemic autoimmune diseases are warranted.

## Summary

Major focus has been placed on the role of  $FoxP3^+$   $T_{Regs}$  in autoimmune diseases. Although decrease in number or function of  $FoxP3^+$   $T_{Regs}$  may favour the autoimmune response in systemic autoimmune diseases, the aetiology of this defect as well as the exact mechanisms of suppression are still elusive and need further studies.

**Fig. 3** Highly purified population of  $FoxP3^+$   $T_{Reg}$  cells for adoptive cell therapy. Peripheral blood mononuclear cells will be isolated from the peripheral blood of a patient, and stimulated *in vitro* with anti-CD3 and anti-CD28 mAbs in the presence of IL-1 $\beta$ , IL-6, IL-2, IL-15, IL-21 and IL-23 for 7 days. This step is necessary to increase the limited number of circulating  $FoxP3^+$   $T_{Regs}$ , and to induce differentiation of a fraction of  $FoxP3^+$  T cells with potential to become IL-17-producing cells. Next,  $CD4^+$  T cells will be isolated by negative selection using an immunomagnetic beads technique. Subsequently,  $CD4^+$  T cells will be stained for bead-conjugated anti-CD49d and anti-CD127. In this step, the cells double positive for CD49d and CD127 (which are the IL-17-producing cells) will be removed, and highly purified  $FoxP3^+$   $T_{Regs}$  will thus be isolated by negative selection (being double negative for CD49d and CD127). Finally, this fraction of functional  $T_{Reg}$  cells, which are not positively but negatively selected by antibodies, can be infused into the patient.

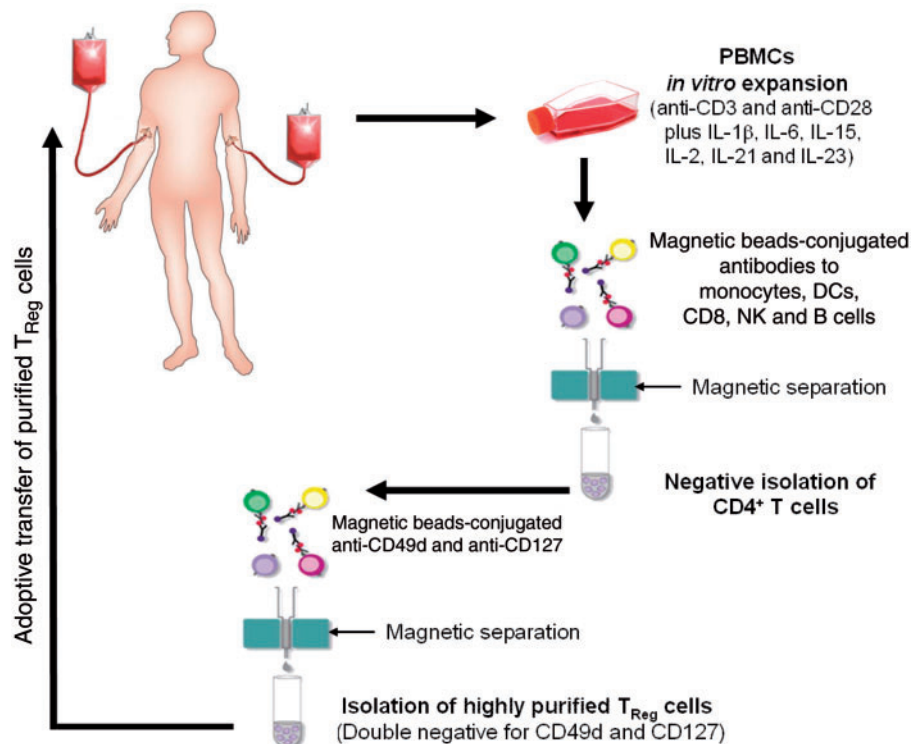

Recent studies in humans demonstrate skewing in a fraction of FoxP3<sup>+</sup> T<sub>Regs</sub> towards pathogenic IL-17-secreting cells in the context of a pro-inflammatory cytokine milieu. In this regard, interpretation of impaired function/numbers of FoxP3<sup>+</sup> T<sub>Regs</sub> in systemic autoimmune diseases should be handled with caution and needs to be updated. In addition, the current strategies for T<sub>Reg</sub>-based forms of therapy in autoimmune diseases should take this issue into account. In view of recent findings, removal of CD49d<sup>+</sup>CD127<sup>+</sup> cells from the CD4<sup>+</sup> T cells provides access to highly pure populations of immune-suppressive FoxP3<sup>+</sup> T<sub>Regs</sub> free of IL-17-secreting cells. Thus, future perspectives for cellular therapy in human autoimmune diseases could be built on re-injection of *ex vivo* expanded CD49d<sup>-</sup>CD127<sup>-</sup> T<sub>Regs</sub>.

#### Rheumatology key messages

- FoxP3<sup>+</sup> T<sub>Regs</sub> are not terminally differentiated, but may convert into IL-17-producing effector T cells.
- Reduced numbers of FoxP3<sup>+</sup> T<sub>Regs</sub> in autoimmune inflammation may occur due to their conversion into IL-17-producing cells.
- T<sub>Reg</sub>-based cellular therapy could be built on re-injection of *ex vivo* expanded, highly pure T<sub>Regs</sub>.

## Acknowledgements

**Funding:** Our study is funded by DFG grant GRK 880.

**Disclosure statement:** A.M.H.B. is an employee of Merck Research Laboratories, Merck, Sharpe and Dohme, Oss, The Netherlands. All other authors have declared no conflicts of interest.

## References

- 1 Fowell D, Mason D. Evidence that the T cell repertoire of normal rats contains cells with the potential to cause diabetes. Characterization of the CD4<sup>+</sup> T cell subset that inhibits this autoimmune potential. *J Exp Med* 1993;177: 627–36.
- 2 Danke NA, Koelle DM, Yee C, Beheray S, Kwok WW. Autoreactive T cells in healthy individuals. *J Immunol* 2004;172:5967–72.
- 3 Gershon RK, Kondo K. Cell interactions in the induction of tolerance: the role of thymic lymphocytes. *Immunology* 1970;18:723–37.
- 4 Gershon RK, Kondo K. Infectious immunological tolerance. *Immunology* 1971;21:903–14.
- 5 Sakaguchi S, Sakaguchi N, Asano M, Itoh M, Toda M. Immunologic self-tolerance maintained by activated T cells expressing IL-2 receptor alpha-chains (CD25). Breakdown of a single mechanism of self-tolerance causes various autoimmune diseases. *J Immunol* 1995; 155:1151–64.
- 6 Baecher-Allan C, Brown JA, Freeman GJ, Hafler DA. CD4<sup>+</sup>CD25 high regulatory cells in human peripheral blood. *J Immunol* 2001;167:1245–53.
- 7 Valencia X, Lipsky PE. CD4<sup>+</sup>CD25<sup>+</sup>FoxP3<sup>+</sup> regulatory T cells in autoimmune diseases. *Nat Clin Pract Rheumatol* 2007;3:619–26.
- 8 Itoh M, Takahashi T, Sakaguchi N *et al*. Thymus and autoimmunity: production of CD25<sup>+</sup>CD4<sup>+</sup> naturally anergic and suppressive T cells as a key function of the thymus in maintaining immunologic self-tolerance. *J Immunol* 1999; 162:5317–26.
- 9 Bensing SJ, Bandeira A, Jordan MS, Caton AJ, Laufer TM. Major histocompatibility complex class II-positive cortical epithelium mediates the selection of CD4(+)25(+) immunoregulatory T cells. *J Exp Med* 2001; 194:427–38.
- 10 Aschenbrenner K, D'Cruz LM, Vollmann EH *et al*. Selection of Foxp3<sup>+</sup> regulatory T cells specific for self antigen expressed and presented by Aire<sup>+</sup> medullary thymic epithelial cells. *Nat Immunol* 2007;8:351–8.
- 11 Chen Y, Kuchroo VK, Inobe J, Hafler DA, Weiner HL. Regulatory T cell clones induced by oral tolerance: suppression of autoimmune encephalomyelitis. *Science* 1994;265:1237–40.
- 12 Sundstedt A, O'Neill EJ, Nicolson KS, Wraith DC. Role for IL-10 in suppression mediated by peptide-induced regulatory T cells in vivo. *J Immunol* 2003;170:1240–8.
- 13 Groux H, O'Garra A, Bigler M *et al*. A CD4<sup>+</sup> T-cell subset inhibits antigen-specific T-cell responses and prevents colitis. *Nature* 1997;389:737–42.
- 14 Coombes JL, Siddiqui KR, Arancibia-Carcamo CV *et al*. A functionally specialized population of mucosal CD103<sup>+</sup> DCs induces Foxp3<sup>+</sup> regulatory T cells via a TGF-beta and retinoic acid-dependent mechanism. *J Exp Med* 2007; 204:1757–64.
- 15 Sun CM, Hall JA, Blank RB *et al*. Small intestine lamina propria dendritic cells promote de novo generation of Foxp3 T reg cells via retinoic acid. *J Exp Med* 2007;204: 1775–85.
- 16 Miyara M, Yoshioka Y, Kitoh A *et al*. Functional delineation and differentiation dynamics of human CD4<sup>+</sup> T cells expressing the FoxP3 transcription factor. *Immunity* 2009; 30:899–911.
- 17 Fontenot JD, Gavin MA, Rudensky AY. Foxp3 programs the development and function of CD4<sup>+</sup>CD25<sup>+</sup> regulatory T cells. *Nat Immunol* 2003;4:330–6.
- 18 Hori S, Nomura T, Sakaguchi S. Control of regulatory T cell development by the transcription factor Foxp3. *Science* 2003;299:1057–61.
- 19 Brunkow ME, Jeffery EW, Hjerrild KA *et al*. Disruption of a new forkhead/winged-helix protein, scurfy, results in the fatal lymphoproliferative disorder of the scurfy mouse. *Nat Genet* 2001;27:68–73.
- 20 Chatila TA, Blaeser F, Ho N *et al*. JM2, encoding a fork head-related protein, is mutated in X-linked autoimmunity-allergic dysregulation syndrome. *J Clin Invest* 2000;106:R75–81.
- 21 Wildin RS, Ramsdell F, Peake J *et al*. X-linked neonatal diabetes mellitus, enteropathy and endocrinopathy syndrome is the human equivalent of mouse scurfy. *Nat Genet* 2001;27:18–20.
- 22 Bennett CL, Christie J, Ramsdell F *et al*. The immune dysregulation, polyendocrinopathy, enteropathy, X-linked syndrome (IPEX) is caused by mutations of FOXP3. *Nat Genet* 2001;27:20–1.



- 23 Wang J, Ioan-Facsinay A, van der Voort EI, Huizinga TW, Toes RE. Transient expression of FOXP3 in human activated nonregulatory CD4<sup>+</sup> T cells. *Eur J Immunol* 2007;37:129–38.
- 24 Vieira PL, Christensen JR, Minaae S *et al.* IL-10-secreting regulatory T cells do not express Foxp3 but have comparable regulatory function to naturally occurring CD4<sup>+</sup>CD25<sup>+</sup> regulatory T cells. *J Immunol* 2004;172:5986–93.
- 25 Takahashi T, Tagami T, Yamazaki S *et al.* Immunologic self-tolerance maintained by CD25(+)CD4(+) regulatory T cells constitutively expressing cytotoxic T lymphocyte-associated antigen 4. *J Exp Med* 2000;192:303–10.
- 26 Huang CT, Workman CJ, Flies D *et al.* Role of LAG-3 in regulatory T cells. *Immunity* 2004;21:503–13.
- 27 McHugh RS, Whitters MJ, Piccirillo CA *et al.* CD4(+)CD25(+) immunoregulatory T cells: gene expression analysis reveals a functional role for the glucocorticoid-induced TNF receptor. *Immunity* 2002;16:311–23.
- 28 Szanya V, Ermann J, Taylor C, Holness C, Fathman CG. The subpopulation of CD4<sup>+</sup>CD25<sup>+</sup> splenocytes that delays adoptive transfer of diabetes expresses L-selectin and high levels of CCR7. *J Immunol* 2002;169:2461–5.
- 29 Lehmann J, Huehn J, de la RM *et al.* Expression of the integrin alpha Ebeta 7 identifies unique subsets of CD25<sup>+</sup> as well as CD25-regulatory T cells. *Proc Natl Acad Sci USA* 2002;99:13031–6.
- 30 Iellem A, Mariani M, Lang R *et al.* Unique chemotactic response profile and specific expression of chemokine receptors CCR4 and CCR8 by CD4(+)CD25(+) regulatory T cells. *J Exp Med* 2001;194:847–53.
- 31 Bruder D, Probst-Kepper M, Westendorf AM *et al.* Neuropilin-1: a surface marker of regulatory T cells. *Eur J Immunol* 2004;34:623–30.
- 32 Liu W, Putnam AL, Xu-Yu Z *et al.* CD127 expression inversely correlates with FoxP3 and suppressive function of human CD4<sup>+</sup> T reg cells. *J Exp Med* 2006;203:1701–11.
- 33 Seddiki N, Santner-Nanan B, Martinson J *et al.* Expression of interleukin (IL)-2 and IL-7 receptors discriminates between human regulatory and activated T cells. *J Exp Med* 2006;203:1693–700.
- 34 Yamaguchi T, Hirota K, Nagahama K *et al.* Control of immune responses by antigen-specific regulatory T cells expressing the folate receptor. *Immunity* 2007;27:145–59.
- 35 Mandapathil M, Lang S, Gorelik E, Whiteside TL. Isolation of functional human regulatory T cells (Treg) from the peripheral blood based on the CD39 expression. *J Immunol Methods* 2009;346:55–63.
- 36 Tran DQ, Andersson J, Hardwick D, Bebris L, Illei GG, Shevach EM. Selective expression of latency-associated peptide (LAP) and IL-1 receptor type I/II (CD121a/CD121b) on activated human FOXP3<sup>+</sup> regulatory T cells allows for their purification from expansion cultures. *Blood* 2009;113:5125–33.
- 37 Thornton AM, Shevach EM. CD4<sup>+</sup>CD25<sup>+</sup> immunoregulatory T cells suppress polyclonal T cell activation in vitro by inhibiting interleukin 2 production. *J Exp Med* 1998;188:287–96.
- 38 Lim HW, Hillsamer P, Banham AH, Kim CH. Cutting edge: direct suppression of B cells by CD4<sup>+</sup> CD25<sup>+</sup> regulatory T cells. *J Immunol* 2005;175:4180–3.
- 39 Nakamura K, Kitani A, Fuss I *et al.* TGF-beta 1 plays an important role in the mechanism of CD4<sup>+</sup>CD25<sup>+</sup> regulatory T cell activity in both humans and mice. *J Immunol* 2004;172:834–42.
- 40 Suri-Payer E, Cantor H. Differential cytokine requirements for regulation of autoimmune gastritis and colitis by CD4(+)CD25(+) T cells. *J Autoimmun* 2001;16:115–23.
- 41 Berg DJ, Davidson N, Kuhn R *et al.* Enterocolitis and colon cancer in interleukin-10-deficient mice are associated with aberrant cytokine production and CD4(+) TH1-like responses. *J Clin Invest* 1996;98:1010–20.
- 42 Annacker O, Pimenta-Araujo R, Burlen-Defranoux O, Barbosa TC, Cumano A, Bandeira A. CD25<sup>+</sup> CD4<sup>+</sup> T cells regulate the expansion of peripheral CD4 T cells through the production of IL-10. *J Immunol* 2001;166:3008–18.
- 43 Kingsley CI, Karim M, Bushell AR, Wood KJ. CD25<sup>+</sup>CD4<sup>+</sup> regulatory T cells prevent graft rejection: CTLA-4- and IL-10-dependent immunoregulation of alloresponses. *J Immunol* 2002;168:1080–6.
- 44 Christ M, McCartney-Francis NL, Kulkarni AB *et al.* Immune dysregulation in TGF-beta 1-deficient mice. *J Immunol* 1994;153:1936–46.
- 45 Letterio JJ. Murine models define the role of TGF-beta as a master regulator of immune cell function. *Cytokine Growth Factor Rev* 2000;11:81–7.
- 46 Josien R, Douillard P, Guillot C *et al.* A critical role for transforming growth factor-beta in donor transfusion-induced allograft tolerance. *J Clin Invest* 1998;102:1920–6.
- 47 Collison LW, Workman CJ, Kuo TT *et al.* The inhibitory cytokine IL-35 contributes to regulatory T-cell function. *Nature* 2007;450:566–9.
- 48 Niedbala W, Wei XQ, Cai B *et al.* IL-35 is a novel cytokine with therapeutic effects against collagen-induced arthritis through the expansion of regulatory T cells and suppression of Th17 cells. *Eur J Immunol* 2007;37:3021–9.
- 49 Collison LW, Pillai MR, Chaturvedi V, Vignali DA. Regulatory T cell suppression is potentiated by target T cells in a cell contact, IL-35- and IL-10-dependent manner. *J Immunol* 2009;182:6121–8.
- 50 Grossman WJ, Verbsky JW, Barchet W, Colonna M, Atkinson JP, Ley TJ. Human T regulatory cells can use the perforin pathway to cause autologous target cell death. *Immunity* 2004;21:589–601.
- 51 Gondek DC, Lu LF, Quezada SA, Sakaguchi S, Noelle RJ. Cutting edge: contact-mediated suppression by CD4<sup>+</sup>CD25<sup>+</sup> regulatory cells involves a granzyme B-dependent, perforin-independent mechanism. *J Immunol* 2005;174:1783–6.
- 52 Zhao DM, Thornton AM, DiPaolo RJ, Shevach EM. Activated CD4<sup>+</sup>CD25<sup>+</sup> T cells selectively kill B lymphocytes. *Blood* 2006;107:3925–32.
- 53 Fallarino F, Grohmann U, You S *et al.* The combined effects of tryptophan starvation and tryptophan catabolites down-regulate T cell receptor zeta-chain and induce a regulatory phenotype in naive T cells. *J Immunol* 2006;176:6752–61.
- 54 Liang B, Workman C, Lee J *et al.* Regulatory T cells inhibit dendritic cells by lymphocyte activation gene-3 engagement of MHC class II. *J Immunol* 2008;180:5916–26.
- 55 Deaglio S, Dwyer KM, Gao W *et al.* Adenosine generation catalyzed by CD39 and CD73 expressed on regulatory

- T cells mediates immune suppression. *J Exp Med* 2007; 204:1257–65.
- 56 Borsellino G, Kleinewietfeld M, Di Mitri D *et al.* Expression of ectonucleotidase CD39 by Foxp3<sup>+</sup> Treg cells: hydrolysis of extracellular ATP and immune suppression. *Blood* 2007;110:1225–32.
- 57 Kobie JJ, Shah PR, Yang L, Rebhahn JA, Fowell DJ, Mosmann TR. T regulatory and primed uncommitted CD4 T cells express CD73, which suppresses effector CD4 T cells by converting 5'-adenosine monophosphate to adenosine. *J Immunol* 2006;177:6780–6.
- 58 Cua DJ, Sherlock J, Chen Y *et al.* Interleukin-23 rather than interleukin-12 is the critical cytokine for autoimmune inflammation of the brain. *Nature* 2003;421:744–8.
- 59 Murphy CA, Langrish CL, Chen Y *et al.* Divergent pro- and antiinflammatory roles for IL-23 and IL-12 in joint autoimmune inflammation. *J Exp Med* 2003;198:1951–7.
- 60 Bettelli E, Carrier Y, Gao W *et al.* Reciprocal developmental pathways for the generation of pathogenic effector TH17 and regulatory T cells. *Nature* 2006;441:235–8.
- 61 Du J, Huang C, Zhou B, Ziegler SF. Isoform-specific inhibition of ROR alpha-mediated transcriptional activation by human FOXP3. *J Immunol* 2008;180:4785–92.
- 62 Koenen HJ, Smeets RL, Vink PM, van Rijssen E, Boots AM, Joosten I. Human CD25<sup>high</sup>Foxp3<sup>pos</sup> regulatory T cells differentiate into IL-17-producing cells. *Blood* 2008;112:2340–52.
- 63 Ayyoub M, Deknuydt F, Raimbaud I *et al.* Human memory FOXP3<sup>+</sup> Tregs secrete IL-17 *ex vivo* and constitutively express the T(H)17 lineage-specific transcription factor RORgamma t. *Proc Natl Acad Sci USA* 2009;106:8635–40.
- 64 Voo KS, Wang YH, Santori FR *et al.* Identification of IL-17-producing FOXP3<sup>+</sup> regulatory T cells in humans. *Proc Natl Acad Sci USA* 2009;106:4793–8.
- 65 Beriou G, Costantino CM, Ashley CW *et al.* IL-17-producing human peripheral regulatory T cells retain suppressive function. *Blood* 2009;113:4240–9.
- 66 Deknuydt F, Bioley G, Valmori D, Ayyoub M. IL-1beta and IL-2 convert human Treg into T(H)17 cells. *Clin Immunol* 2009;131:298–307.
- 67 Lee WW, Kang SW, Choi J *et al.* Regulating human Th17 cells via differential expression of IL-1 receptor. *Blood* 2010;115:530–40.
- 68 Harris KM, Fasano A, Mann DL. Monocytes differentiated with IL-15 support Th17 and Th1 responses to wheat gliadin: implications for celiac disease. *Clin Immunol* 2010; 135:430–9.
- 69 Ferretti S, Bonneau O, Dubois GR, Jones CE, Trifilieff A. IL-17, produced by lymphocytes and neutrophils, is necessary for lipopolysaccharide-induced airway neutrophilia: IL-15 as a possible trigger. *J Immunol* 2003; 170:2106–12.
- 70 Hayashi T, Hasegawa K, Adachi C. Elimination of CD4(+)CD25(+) T cell accelerates the development of glomerulonephritis during the preactive phase in autoimmune-prone female NZB x NZW F mice. *Int J Exp Pathol* 2005;86:289–96.
- 71 Hsu WT, Suen JL, Chiang BL. The role of CD4CD25 T cells in autoantibody production in murine lupus. *Clin Exp Immunol* 2006;145:513–9.
- 72 Lee JH, Wang LC, Lin YT, Yang YH, Lin DT, Chiang BL. Inverse correlation between CD4<sup>+</sup> regulatory T-cell population and autoantibody levels in paediatric patients with systemic lupus erythematosus. *Immunology* 2006; 117:280–6.
- 73 Crispin JC, Martinez A, Alcocer-Varela J. Quantification of regulatory T cells in patients with systemic lupus erythematosus. *J Autoimmun* 2003;21:273–6.
- 74 Liu MF, Wang CR, Fung LL, Wu CR. Decreased CD4<sup>+</sup>CD25<sup>+</sup> T cells in peripheral blood of patients with systemic lupus erythematosus. *Scand J Immunol* 2004;59: 198–202.
- 75 Miyara M, Amoura Z, Parizot C *et al.* Global natural regulatory T cell depletion in active systemic lupus erythematosus. *J Immunol* 2005;175:8392–400.
- 76 Suen JL, Li HT, Jong YJ, Chiang BL, Yen JH. Altered homeostasis of CD4(+) FoxP3(+) regulatory T-cell subpopulations in systemic lupus erythematosus. *Immunology* 2009;127:196–205.
- 77 Zhang B, Zhang X, Tang F, Zhu L, Liu Y. Reduction of forkhead box P3 levels in CD4<sup>+</sup>CD25<sup>high</sup> T cells in patients with new-onset systemic lupus erythematosus. *Clin Exp Immunol* 2008;153:182–7.
- 78 Bonelli M, Savitskaya A, Steiner CW, Rath E, Smolen JS, Scheinecker C. Phenotypic and functional analysis of CD4<sup>+</sup>. *J Immunol* 2009;182:1689–95.
- 79 Alvarado-Sanchez B, Hernandez-Castro B, Portales-Perez D *et al.* Regulatory T cells in patients with systemic lupus erythematosus. *J Autoimmun* 2006; 27:110–8.
- 80 Valencia X, Yarboro C, Illei G, Lipsky PE. Deficient CD4<sup>+</sup>CD25<sup>high</sup> T regulatory cell function in patients with active systemic lupus erythematosus. *J Immunol* 2007; 178:2579–88.
- 81 Wong CK, Lit LC, Tam LS, Li EK, Wong PT, Lam CW. Hyperproduction of IL-23 and IL-17 in patients with systemic lupus erythematosus: implications for Th17-mediated inflammation in auto-immunity. *Clin Immunol* 2008;127:385–93.
- 82 Baranda L, de la FH, Layseca-Espinosa E *et al.* IL-15 and IL-15R in leucocytes from patients with systemic lupus erythematosus. *Rheumatology* 2005;44: 1507–13.
- 83 Aringer M, Stummvoll GH, Steiner G *et al.* Serum interleukin-15 is elevated in systemic lupus erythematosus. *Rheumatology* 2001;40:876–81.
- 84 Park YB, Kim DS, Lee WK, Suh CH, Lee SK. Elevated serum interleukin-15 levels in systemic lupus erythematosus. *Yonsei Med J* 1999;40:343–8.
- 85 Zhao XF, Pan HF, Yuan H *et al.* Increased serum interleukin 17 in patients with systemic lupus erythematosus. *Mol Biol Rep* 2010;37:81–5.
- 86 Shah K, Lee WW, Lee SH *et al.* Dysregulated balance of Th17 and Th1 cells in systemic lupus erythematosus. *Arthritis Res Ther* 2010;12:R53.
- 87 Cao D, Malmstrom V, Baecher-Allan C, Hafler D, Klareskog L, Trollmo C. Isolation and functional characterization of regulatory CD25<sup>bright</sup>CD4<sup>+</sup> T cells from the target organ of patients with rheumatoid arthritis. *Eur J Immunol* 2003;33:215–23.
- 88 Ehrenstein MR, Evans JG, Singh A *et al.* Compromised function of regulatory T cells in rheumatoid arthritis and reversal by anti-TNFalpha therapy. *J Exp Med* 2004;200: 277–85.

- 89 van Amelsfort JM, van Roon JA, Noordegraaf M *et al.* Proinflammatory mediator-induced reversal of CD4<sup>+</sup>,CD25<sup>+</sup> regulatory T cell-mediated suppression in rheumatoid arthritis. *Arthritis Rheum* 2007;56:732–42.
- 90 Gonzalez-Alvaro I, Ortiz AM, Garcia-Vicuna R, Balsa A, Pascual-Salcedo D, Laffon A. Increased serum levels of interleukin-15 in rheumatoid arthritis with long-term disease. *Clin Exp Rheumatol* 2003;21:639–42.
- 91 Turkow EW, van der Heijden IM, Breedveld FC *et al.* Increased expression of IL-15 in the synovium of patients with rheumatoid arthritis compared with patients with Yersinia-induced arthritis and osteoarthritis. *J Pathol* 1997;181:444–50.
- 92 Ziolkowska M, Koc A, Luszczkiewicz G *et al.* High levels of IL-17 in rheumatoid arthritis patients: IL-15 triggers in vitro IL-17 production via cyclosporin A-sensitive mechanism. *J Immunol* 2000;164:2832–8.
- 93 Shahrara S, Huang Q, Mandelin AM, Pope RM. TH-17 cells in rheumatoid arthritis. *Arthritis Res Ther* 2008;10:R93.
- 94 Shen H, Goodall JC, Hill Gaston JS. Frequency and phenotype of peripheral blood Th17 cells in ankylosing spondylitis and rheumatoid arthritis. *Arthritis Rheum* 2009;60:1647–56.
- 95 van der Woude FJ, Rasmussen N, Lobatto S *et al.* Autoantibodies against neutrophils and monocytes: tool for diagnosis and marker of disease activity in Wegener's granulomatosis. *Lancet* 1985;1:425–9.
- 96 Kallenberg CG, Heeringa P, Stegeman CA. Mechanisms of disease: pathogenesis and treatment of ANCA-associated vasculitides. *Nat Clin Pract Rheumatol* 2006;2:661–70.
- 97 Abdulahad WH, Stegeman CA, Limburg PC, Kallenberg CG. CD4-positive effector memory T cells participate in disease expression in ANCA-associated vasculitis. *Ann N Y Acad Sci* 2007;1107:22–31.
- 98 Abdulahad WH, Stegeman CA, Kallenberg CG. Review article: the role of CD4(+) T cells in ANCA-associated systemic vasculitis. *Nephrology* 2009;14:26–32.
- 99 Berden AE, Kallenberg CG, Savage CO *et al.* Cellular immunity in Wegener's granulomatosis: characterizing T lymphocytes. *Arthritis Rheum* 2009;60:1578–87.
- 100 Abdulahad WH, Stegeman CA, van der Geld YM, Doornbos-van der MB, Limburg PC, Kallenberg CG. Functional defect of circulating regulatory CD4<sup>+</sup> T cells in patients with Wegener's granulomatosis in remission. *Arthritis Rheum* 2007;56:2080–91.
- 101 Nogueira E, Hamour S, Sawant D *et al.* Serum IL-17 and IL-23 levels and autoantigen-specific Th17 cells are elevated in patients with ANCA-associated vasculitis. *Nephrol Dial Transplant* 2010;25:2209–17.
- 102 Capraru D, Muller A, Csernok E *et al.* Expansion of circulating NKG2D<sup>+</sup> effector memory T-cells and expression of NKG2D-ligand MIC in granulomaous lesions in Wegener's granulomatosis. *Clin Immunol* 2008;127:144–50.
- 103 Abdulahad WH, Stegeman CA, Limburg PC, Kallenberg CG. Skewed distribution of Th17 lymphocytes in patients with Wegener's granulomatosis in remission. *Arthritis Rheum* 2008;58:2196–205.
- 104 Fox RI. Sjogren's syndrome. *Lancet* 2005;366:321–31.
- 105 Gottenberg JE, Lavie F, Abbed K *et al.* CD4 CD25high regulatory T cells are not impaired in patients with primary Sjogren's syndrome. *J Autoimmun* 2005;24:235–42.
- 106 Li X, Li X, Qian L *et al.* T regulatory cells are markedly diminished in diseased salivary glands of patients with primary Sjogren's syndrome. *J Rheumatol* 2007;34:2438–45.
- 107 Liu MF, Lin LH, Weng CT, Weng MY. Decreased CD4<sup>+</sup>CD25<sup>+</sup>bright T cells in peripheral blood of patients with primary Sjogren's syndrome. *Lupus* 2008;17:34–9.
- 108 Christodoulou MI, Kapsogeorgou EK, Moutsopoulos NM, Moutsopoulos HM. Foxp3<sup>+</sup> T-regulatory cells in Sjogren's syndrome: correlation with the grade of the autoimmune lesion and certain adverse prognostic factors. *Am J Pathol* 2008;173:1389–96.
- 109 Reksten TR, Jonsson MV, Szyszko EA, Brun JG, Jonsson R, Brokstad KA. Cytokine and autoantibody profiling related to histopathological features in primary Sjogren's syndrome. *Rheumatology* 2009;48:1102–6.
- 110 Nguyen CQ, Hu MH, Li Y, Stewart C, Peck AB. Salivary gland tissue expression of interleukin-23 and interleukin-17 in Sjogren's syndrome: findings in humans and mice. *Arthritis Rheum* 2008;58:734–43.
- 111 Sakai A, Sugawara Y, Kuroishi T, Sasano T, Sugawara S. Identification of IL-18 and Th17 cells in salivary glands of patients with Sjogren's syndrome, and amplification of IL-17-mediated secretion of inflammatory cytokines from salivary gland cells by IL-18. *J Immunol* 2008;181:2898–906.
- 112 Katsifis GE, Rekka S, Moutsopoulos NM, Pillemer S, Wahl SM. Systemic and local interleukin-17 and linked cytokines associated with Sjogren's syndrome immunopathogenesis. *Am J Pathol* 2009;175:1167–77.
- 113 Kleinewietfeld M, Starke M, Di Mitri D *et al.* CD49d provides access to "untouched" human Foxp3<sup>+</sup> Treg free of contaminating effector cells. *Blood* 2009;113:827–36.
